# Supplementary material
Source: MDPI journal article supplement (https://www.mdpi.com/2076-3263/12/11/418)
Supplement: s1 [file s1]

IL TACCUINO

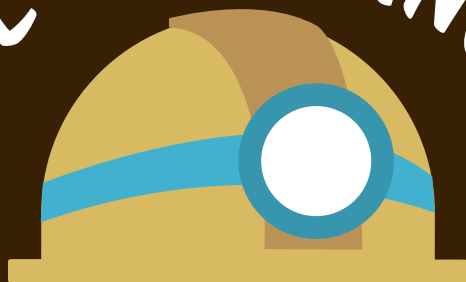

*del giovane*

SPELEOLOGO

I<sup>II</sup> GROTTA DI  
I. FRASASSI

Se almeno una volta ti sei domandato il significato di un insolito paesaggio, di una vetta dalla forma curiosa, di una meravigliosa cavità sotterranea, hai provato sulla tua pelle cosa vuol dire essere geologo. Studiare geologia è stupirsi, incuriosirsi della natura, porsi delle domande per capire appieno ciò che ci circonda. Allora lo strato roccioso diventa la pagina di un libro da leggere con attenzione, che racconta come si è formata quella roccia sott'acqua e come poi è giunta in superficie. Il geologo sa leggere la natura, sa ricostruire la storia di meraviglie naturali come la gola e le grotte di Frasassi. Ed è solo grazie alle sue conoscenze che è possibile preservare, tutelare e valorizzare l'incredibile spettacolo della natura.

Il quaderno didattico è stato realizzato in collaborazione con

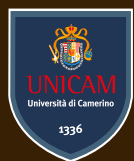

UNIVERSITÀ  
DI CAMERINO

Autori: Fabrizio Bendia\* e Sandro Galdenzi\*  
Con la collaborazione di: Piero Farabollini\*, Stefano Mazzoli\*,  
Pietro Paolo Pierantoni\*, Emanuele Tondi\*

\*Sezione di Geologia dell'Università di Camerino (MC)

Impaginazione e grafica: Brugiattelli design®

QUESTO TACCUINO  
APPARTIENE A

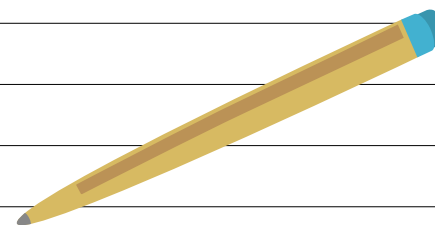

Nome:

Cognome:

Nickname:

Scuola:

Città:

Data:

III GROTTE DI  
I. FRASASSI

## PRIMA DI PARTIRE...

Avventurarsi in una grotta è un'attività molto divertente ed entusiasmante ma all'interno di essa si possono nascondere molti **pericoli** come orsi delle caverne, pipistrelli, dinosauri e uomini preistorici con tanto di clava!

No, ovviamente non vedremo niente di tutto questo ma durante la nostra avventura sarà necessario attenersi ai consigli della guida per non scivolare o battere con la testa in alcuni passaggi bassi e stretti.

Per facilitare le osservazioni in caverne, nicchie e anfratti potrebbe risultare utile portare con sé una , una  e un , strumenti indispensabili per tutti gli esploratori. La **mappa** la forniamo noi ma voi dovrete completarla e arricchirla di importanti elementi!

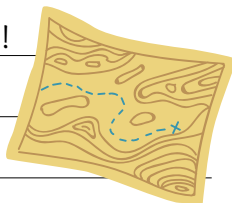

Questi oggetti ci aiuteranno anche nella ricerca del vero tesoro, nascosto nella sala più misteriosa delle grotte:

**la Sala dell'infinito.**

## DOMANDE E RISPOSTE SULLE GROTTI DI FRASASSI

### Cosa è una grotta?

La grotta è una cavità naturale accessibile all'uomo.

Le grotte possono formarsi per diverse cause, ma le più comuni sono le

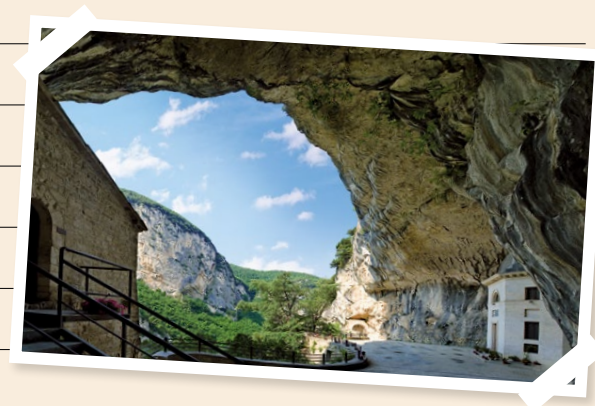

**grotte carsiche**, formate cioè dall'azione di dissoluzione esercitata dalle acque sulle rocce.

Le rocce più tipicamente interessate sono i calcari, rocce molto comuni nel nostro Appennino.

Sono rocce calcaree quelle che il Fiume Sentino incide lungo la Gola di Frasassi e all'interno di esse si sviluppano anche le Grotte di Frasassi.

Come riesce l'acqua a sciogliere la roccia calcarea?

 **ACQUA +**  
anidride carbonica +  
roccia calcarea =  
dissoluzione

Le gocce di pioggia durante la loro discesa in atmosfera e durante il loro percorso nel sottosuolo si arricchiscono di **anidride carbonica** diventando altamente corrosive.

Esse percolano nel terreno "sciogliendo" la roccia calcarea e creando delle piccole cavità (come delle piccole carie) che, nel tempo, si uniscono fra loro dando origine ad ambienti più grandi.

A Frasassi, inoltre, il processo di corrosione della roccia è stato velocizzato dalla presenza di un particolare tipo di acque provenienti, questa volta, direttamente dal basso, le **acque sulfuree**. È soprattutto grazie a loro che si sono formate cavità così grandi. Si può percepire la presenza di queste acque perché sono loro le responsabili dell'odore di uovo sodo che si sente attraversando la gola.

Quanto sono estese le grotte di Frasassi?

A Frasassi sono conosciute e descritte oltre **100 grotte**, che fanno parte di uno stesso sistema carsico, solo parzialmente conosciuto e accessibile all'uomo, la cui lunghezza complessiva è stimata in oltre 35 km.

L'Abisso Ancona rappresenta la cavità più ampia del comprensorio carsico di Frasassi e con il suo milione di metri cubi rappresenta **l'ambiente sotterraneo più grande d'Europa**.

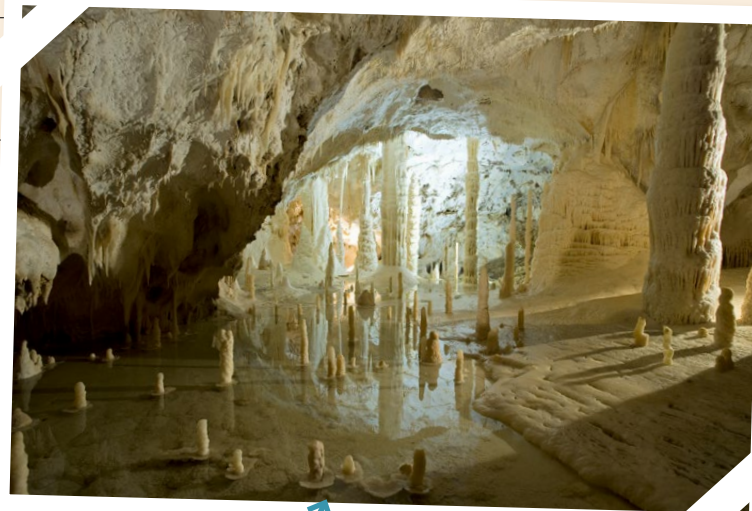

la Sala delle  
candeline

## C'è acqua nelle grotte?

L'acqua presente nelle grotte

appartiene a due tipi principali: le **acque**

**piovane** (che si infiltrano dall'alto e che spesso ci arrivano come goccioline sulla testa) e quelle **sulfuree** (provenienti dal basso). Scendendo verso il basso, le acque finiscono col colmare tutti gli spazi vuoti all'interno della roccia. Si forma così la cosiddetta falda idrica, che è possibile osservare nell'ultima sala del nostro itinerario.

## Che struttura hanno?

Le Grotte di Frasassi costituiscono un insieme assai ramificato di gallerie, pozzi e cunicoli sotterranei, ad andamento principalmente orizzontale. Esse sono chiaramente distribuite su **sette livelli chiamati piani carsici**, che si sono formati durante l'incisione della gola nei lunghi periodi in cui il torrente Sentino stazionava a quella altezza.

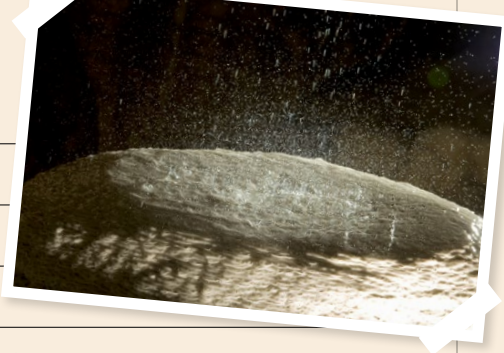

## Quando si sono formate?

Le concrezioni più antiche hanno circa **200.000 anni**, ma ovviamente la grotta è più antica dei depositi che contiene e si può ritenere che la formazione delle prime gallerie sia iniziata circa 2 milioni di anni fa.

## Perché c'è il gesso?

Il gesso, presente in molti tratti del camminamento turistico, rappresenta diretta testimonianza della passata circolazione di **acque sulfuree**. Negli ambienti in cui sono presenti

esse rilasciano delle esalazioni in grado

di attaccare la roccia calcarea e trasformarla in gesso.

Questo minerale è più facilmente solubile e quindi in larga parte viene disciolto e asportato dalle acque circolanti.

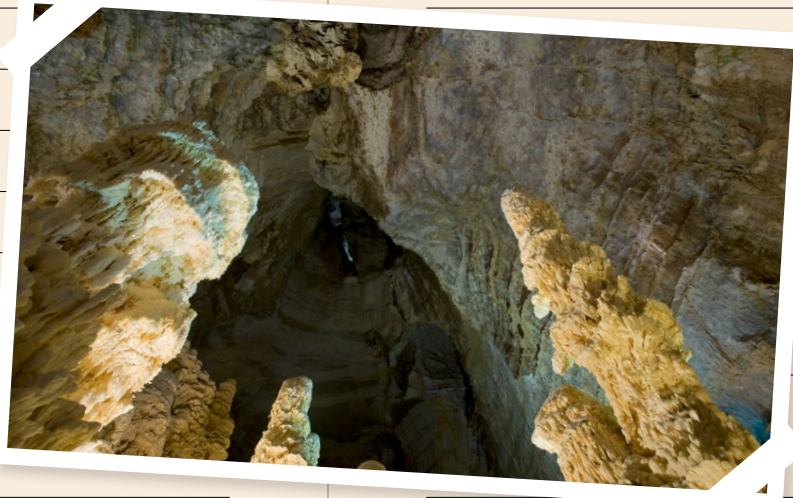



## Perché si formano le concrezioni?

Una galleria abbandonata dalle acque della falda diviene un vuoto nella roccia. Quando l'acqua di infiltrazione che scende dall'alto ne raggiunge la volta può perdere l'anidride carbonica che aveva assorbito, depositando una piccola quantità del carbonato che aveva disciolto. Si tratta, in sostanza, dell'inverso di quanto avvenuto nel primo tratto del percorso sotterraneo della goccia: una parte del calcare che era stato disciolto viene ora depositato, in genere sotto forma di **calcite**. Con il tempo il lento e costante accumulo di questi veli di calcite origina le concrezioni, con una

grande varietà di forme e colori, che danno a ogni concrezione il suo caratteristico aspetto e decorano la grotta.

stalagmite

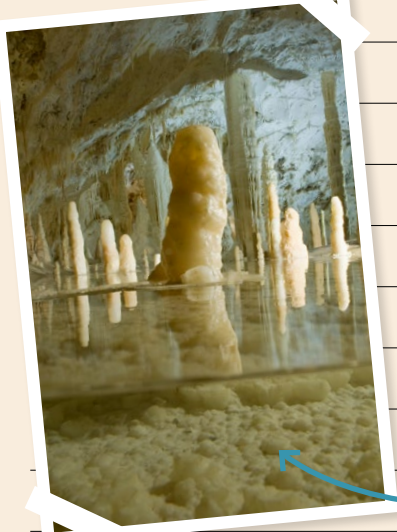

## Quanto crescono le concrezioni?

Una delle domande più frequenti che il visitatore di una grotta si pone riguarda il tempo necessario per la crescita delle concrezioni, in particolare per stalattiti, sulla volta, e stalagmiti, sul pavimento. La velocità in realtà può essere piuttosto variabile, soprattutto in relazione al tipo di concrezione. Il primato spetta sicuramente alle piccole stalattiti tubolari (chiamate capelli d'angelo o spaghetti) per le quali sono riportati valori **fino a 20 mm/anno** (2 cm).

Per le grandi stalattiti il ritmo di crescita è molto minore, pari a **meno di 0,1 fino a 2 mm/**

**anno**. Per le stalagmiti la crescita in altezza è ancora più lenta: **da 0,005 a 0,7 mm/anno**.

Ritmi lenti, ma grandi stalagmiti come i Giganti hanno potuto accrescersi in poco più di 100.000 anni, pochi istanti, nei tempi geologici!

stalattiti

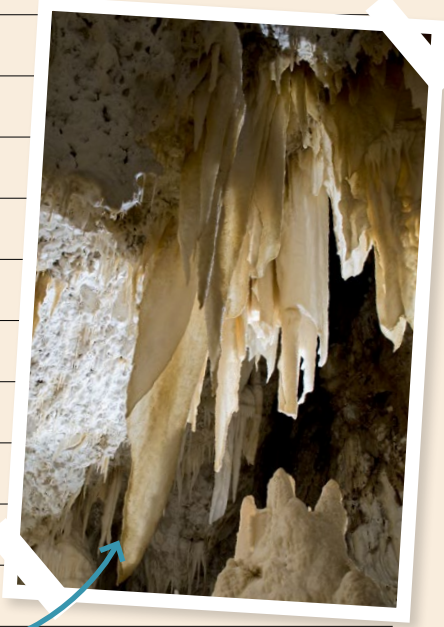

## C'è "vita" nelle grotte?

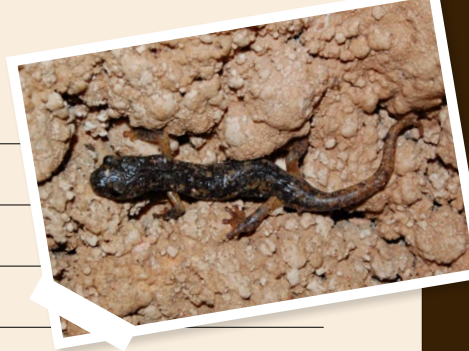

In generale le zone interne delle grotte rappresentano ambienti sfavorevoli per la fauna. L'assenza di luce **impedisce lo sviluppo di piante e organismi**, che rappresentano la base della catena alimentare in superficie. Tuttavia le zone sulfuree delle grotte di Frasassi sono insolitamente ricche di fauna, ben adattata alla vita sotterranea. Le ricerche condotte alla fine del secolo scorso hanno dimostrato che questa comunità di piccoli animali sotterranei sopravvive nutrendosi a spese delle colonie di batteri. In grotta possiamo trovare un anfibio che vive stabilmente nelle grotte, il **geotritone**. Esso è lungo 8-10 cm, ha gli occhi atrofizzati e con la sua lunga lingua si nutre di insetti e ragni.

Negli ambienti più vicini all'aria aperta vive una delle più grandi colonie di pipistrelli dell'Italia centrale.

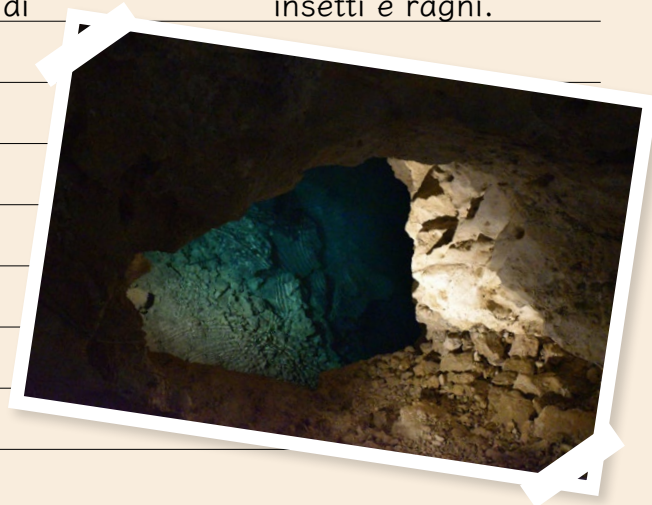

Siete pronti a vestire i panni di un vero esploratore?

Allora apriamo la mappa ed entriamo nella Grotta Grande del Vento

# CHE ABBIAMO INIZIO L'AVVENTURA!

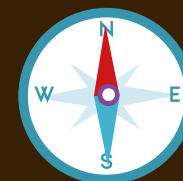

Come in ogni mappa che si rispetti, il percorso che seguiremo è tracciato in rosso mentre i punti di interesse (le varie soste) sono segnalate sulla mappa con una croce.

Queste saranno di colore verde chiaro qualora non dovessero prevedere interazioni con le schede, mentre saranno di colore verde, celeste, rosso, viola e blu nelle soste in cui sono previsti approfondimenti tramite le schede didattiche.



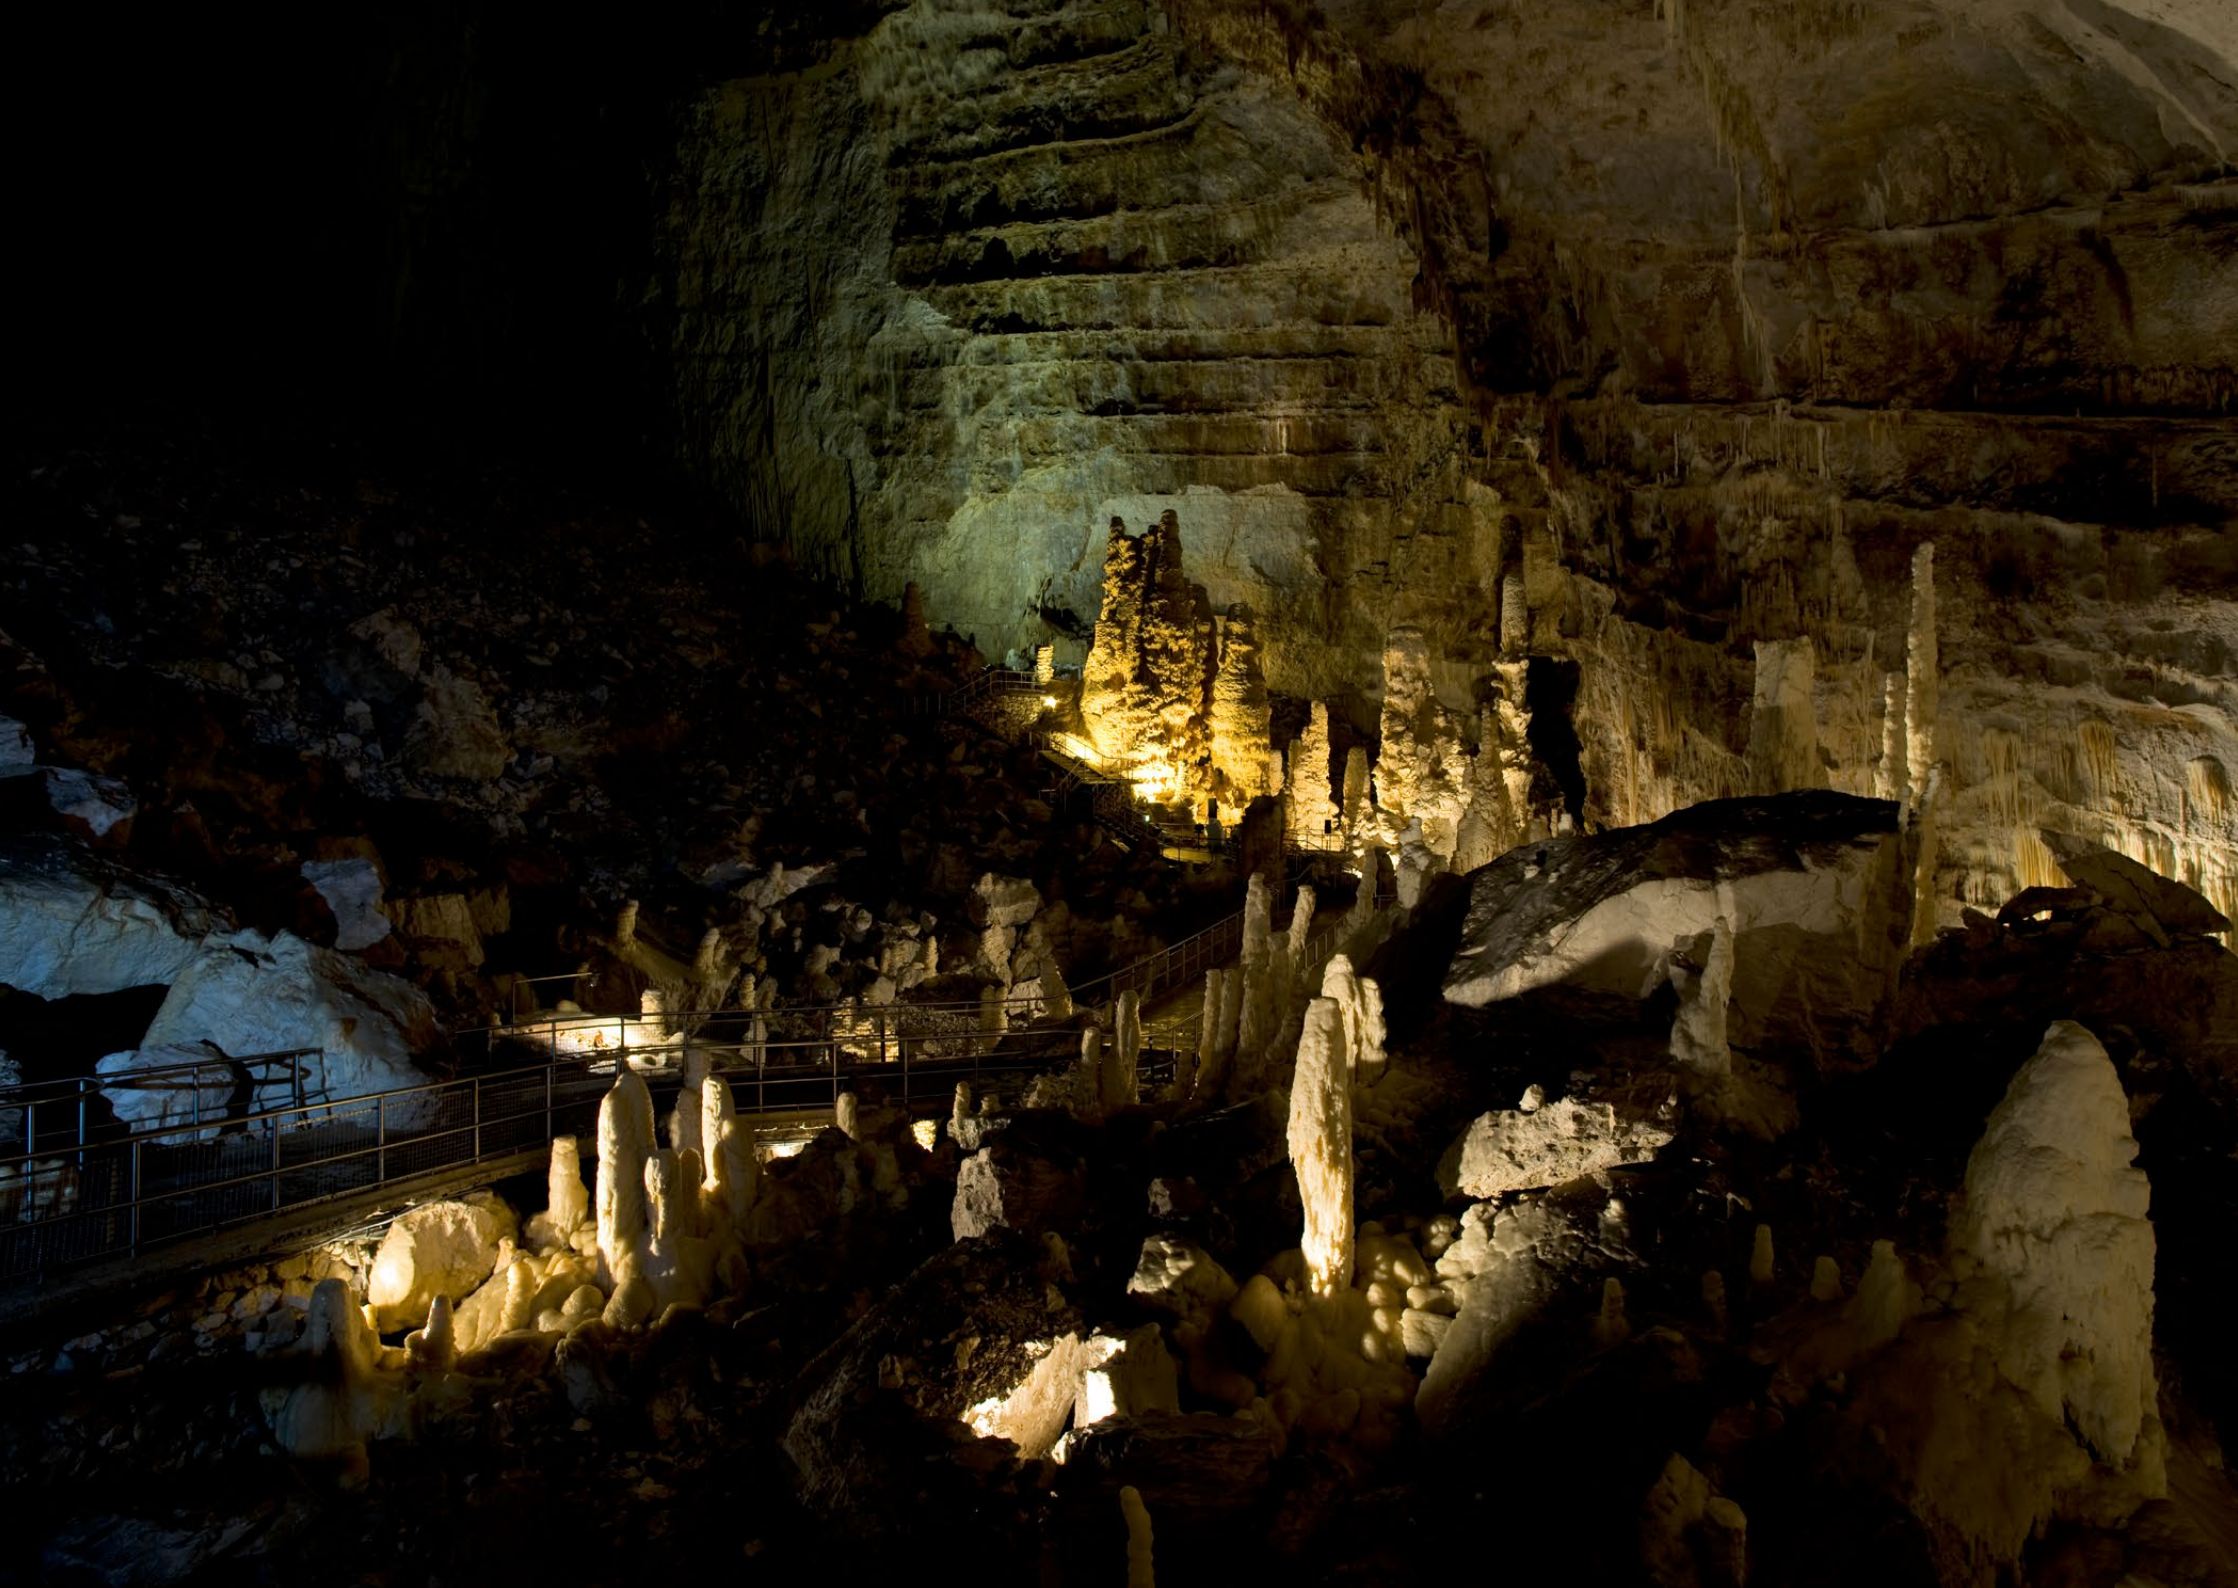



## 2. SOSTA ABISSO ANCONA

SCHEDA  
DIDATTICA

Questa mappa rappresenta la Grotta Grande del Vento vista in pianta, cioè osservata dall'alto verso il basso. La mappa è lo strumento essenziale che tutti gli esploratori dovrebbero portare con sé, grazie ad essa è possibile orientarsi nello spazio e capire dove ci troviamo.

Durante questa prima attività dovremo riconoscere dei punti noti per orientare correttamente la mappa e quindi disegnare su carta alcuni elementi.

Come prima cosa posizioniamo bene la carta rispetto alla freccia del nord, quindi osserviamo i punti di riferimento che già abbiamo (stalattiti dei giganti, camminamento pedonale, pareti della grotta) e proviamo a svolgere il seguente esercizio:

- Completare la mappa disegnando nella Sala Abisso Ancona:
- deposito di frana
- depositi di gesso

LO SAPEVI?

### Perché è così importante il gesso?

Esso ha avuto un ruolo fondamentale nella speleogenesi delle grotte di Frasassi perché le esalazioni altamente corrosive provenienti dall'**acqua sulfurea** che risaliva dal basso agirono attaccando chimicamente la roccia calcarea al di sopra di esse, trasformandola in gesso.

Esso, durante le oscillazioni stagionali della falda, poteva essere quindi dilavato via con molta più facilità rispetto alla roccia (il gesso in acqua viene disciolto) contribuendo così alla creazione di ambienti così ampi.

gesso

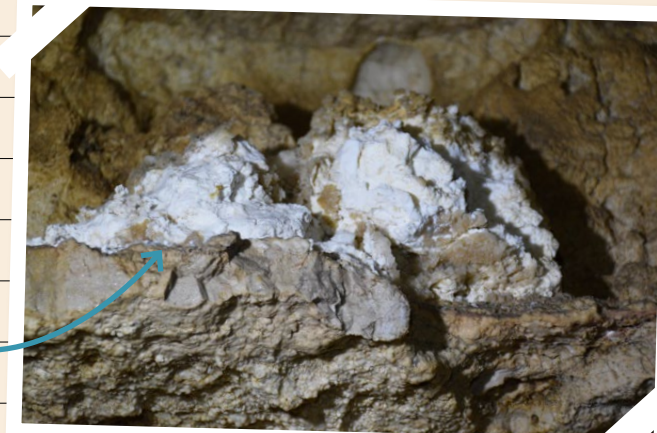

### 3. SOSTA AL LAGHETTO CRISTALLIZZATO

SCHEDA  
DIDATTICA

Un ulteriore metodo di rappresentazione dell'ambiente che ci circonda è la raffigurazione in sezione: immaginate che la Sala dell'Abisso Ancona sia **una torta di cui noi tagliamo una fetta** con il coltello, per vedere qual è la situazione al suo interno. Come dite? Venuta fame?

In questa scheda didattica sarà possibile osservare un taglio Nord-Sud dell'Abisso Ancona e, basandoci su alcuni punti noti riportati nell'immagine, dovranno essere disegnati con cura gli elementi che ci circondano partendo da quello che si è creato per primo. Mi raccomando, controllate sempre con attenzione la barra di scala per rispettare le giuste dimensioni. I giganti, ad esempio, sono alti **fino a 20 metri**. Forza quindi, proviamo a disegnare nella sezione:

- ☐ Gli strati rocciosi
- ☐ La frana
- ☐ Le principali stalattiti
- ☐ I giganti

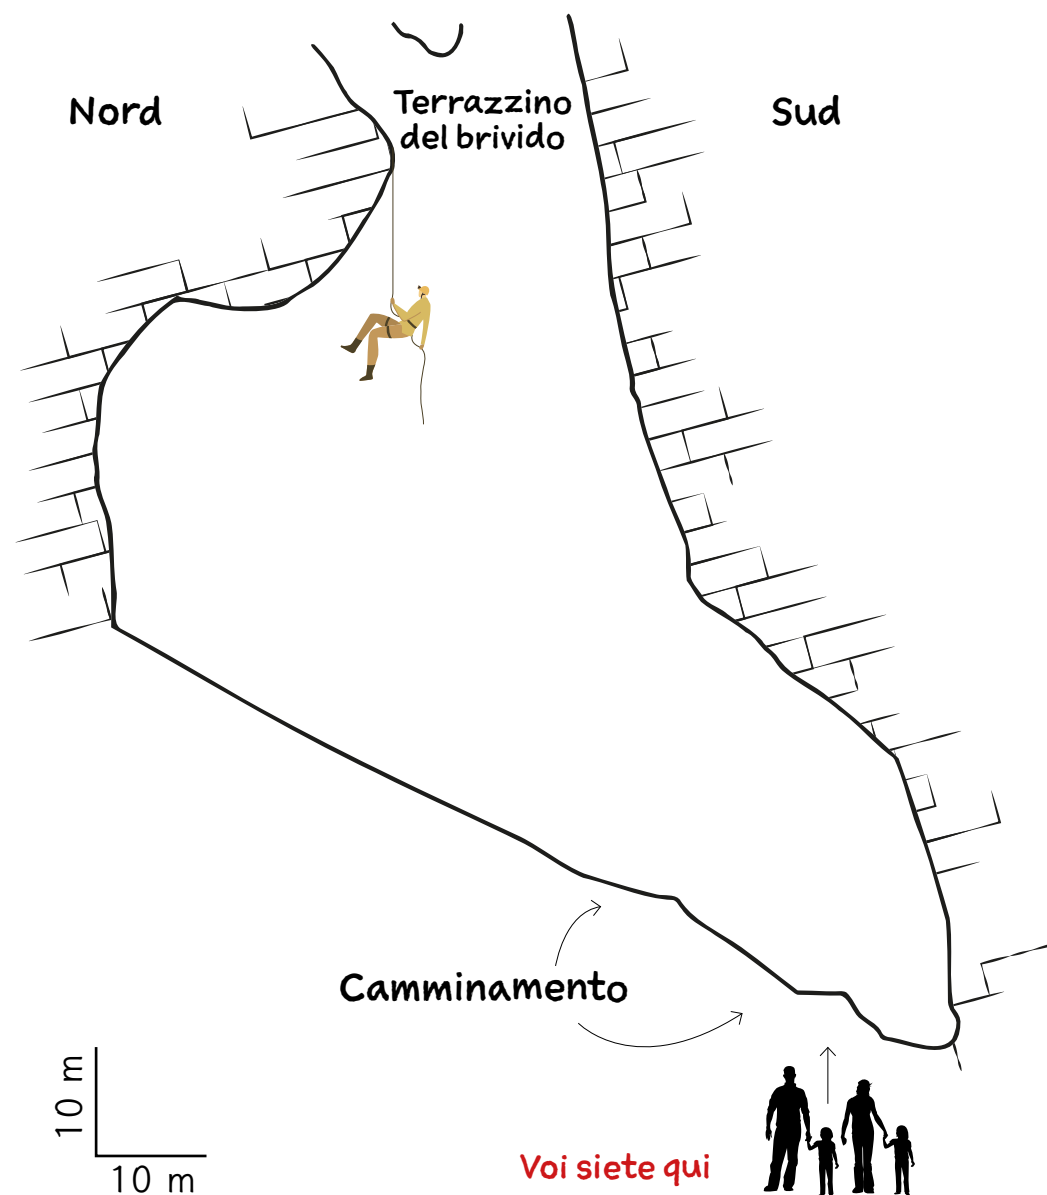

## 4. SOSTA ALLA CASCATA DEL NIAGARA

SCHEDA DIDATTICA

Credevate di esservi scampati un po' di calcoli?

Eh no, la geologia è anche **matematica e geometria!**

Con questo arco naturale ben decorato sopra le nostre teste termina la Sala dell'Abisso Ancona. Proviamo ad approssimarla a un quadrato (un po' storto per la verità!) e a calcolarne il perimetro e l'area.

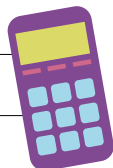

C'è del gesso qui?

Riportalo sulla mappa!

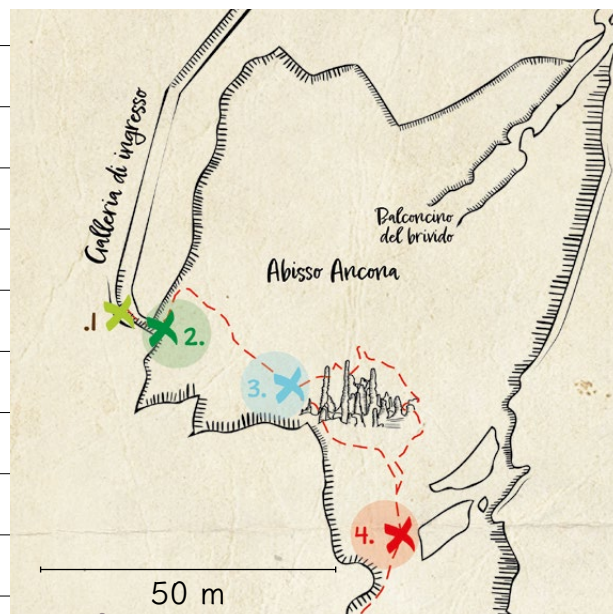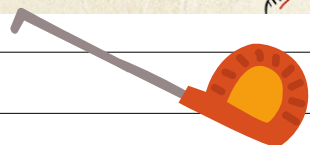

Già stanchi? Forza, che qui abbiamo ancora molto da esplorare! In questo secondo esercizio dovrete fare attenzione a collegare con una freccia i termini esatti con gli elementi che vedete nella foto. E per aiutarvi potrete osservare l'immagine e fare confronti direttamente con quanto vedete dal vivo!

Cascata  
di calcite

Stalagmite

Capelli  
d'angelo

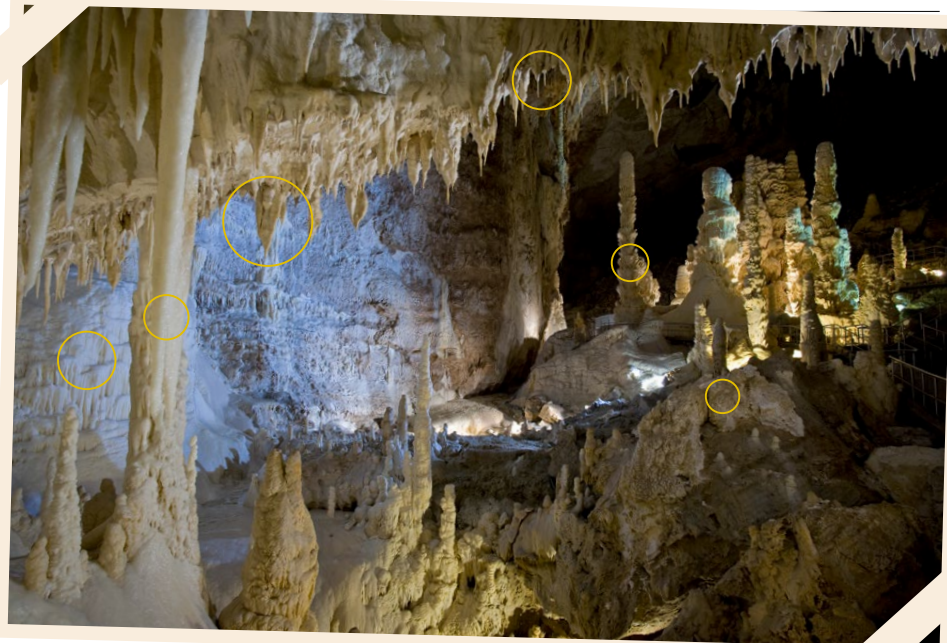

Stalattite

Colonna

Gesso



## 7. SOTTO L'OBELISCO

### SCHEDA DIDATTICA

Da questa prospettiva è possibile osservare la vecchia faglia lungo la parete rocciosa della **Sala duecento**.

**Proviamo a disegnare sulla mappa il punto in cui essa è presente.**

Ora giriamoci e osserviamo alle nostre spalle la parete sulla sinistra dei capelli d'angelo: anche questa è una porzione della faglia.

**Proviamo a riportare un puntino sulla carta anche in questa posizione.**

La faglia è una frattura della roccia in cui si ha scorrimento fra i due blocchi. Essa può facilitare la circolazione dell'acqua del sottosuolo e quindi favorire lo sviluppo delle grotte.

Ora che abbiamo raccolto 2 punti (ognuno nel luogo in cui abbiamo riconosciuto una porzione di questo lineamento) colleghiamoli attraverso una linea. Per 2 punti allineati passa una retta.

**Abbiamo appena imparato a cartografare in pianta una faglia!**

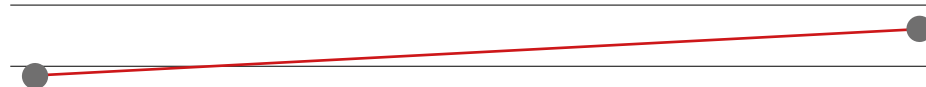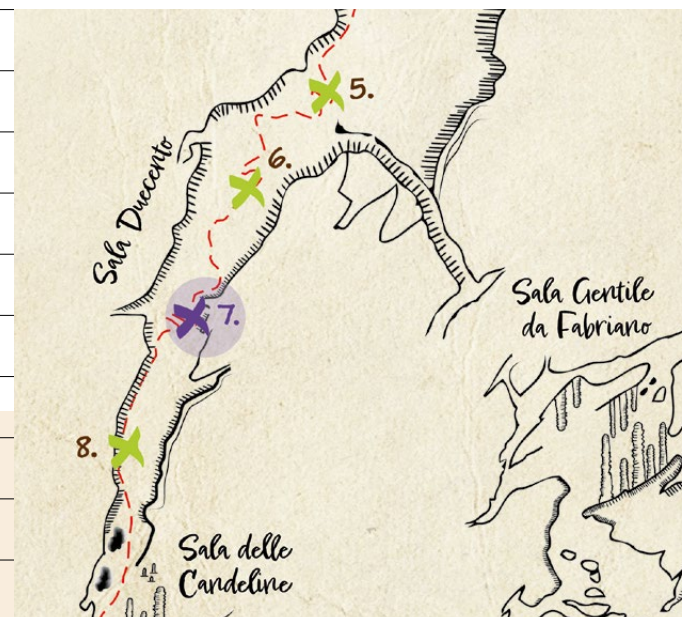

## 9. LA SALA DELL'ORSA

SCHEDA  
DIDATTICA

In quest'ultima sala dovremo tenere gli occhi ben aperti per scovare quello che è considerato il vero tesoro della grotta:

**le stalattiti eccentriche.**

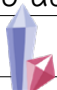

Queste sono concrezioni molto particolari, spesso formano dei riccioli che addirittura possono svilupparsi verso l'alto, sfidando la forza di gravità!

Si dia quindi inizio a una vera e propria caccia al tesoro: munitevi di torce e trovate dove si nascondono le stalattiti eccentriche nell'ultima sala!

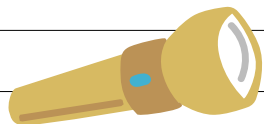

**Acqua, acqua, acqua, fuochino... fuoco!**

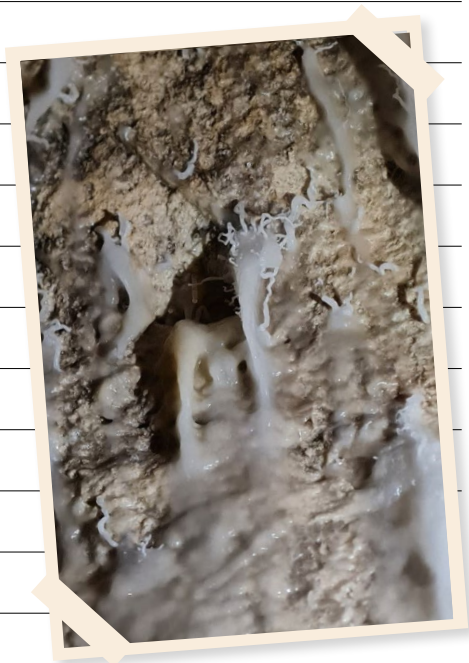

LO SAPEVI?

*Perché questa sala si chiama anche "Sala dell'infinito"?*

Perché i primi speleologi che la visitarono fecero diversi giri prima di accorgersi di trovarsi sempre attorno allo scoglio dell'orsa. Come dicevamo, **in grotta è facile perdere i punti di riferimento** e una volta lo era molto di più perché non era allestito il camminamento turistico e nemmeno era presente la luce artificiale. Gli esploratori potevano contare solo sulla piccola fiammella sopra il loro

caschetto, che illuminava per un raggio di pochi metri. Come dite? Esatto, inoltre loro non avevano ancora la nostra mappa!

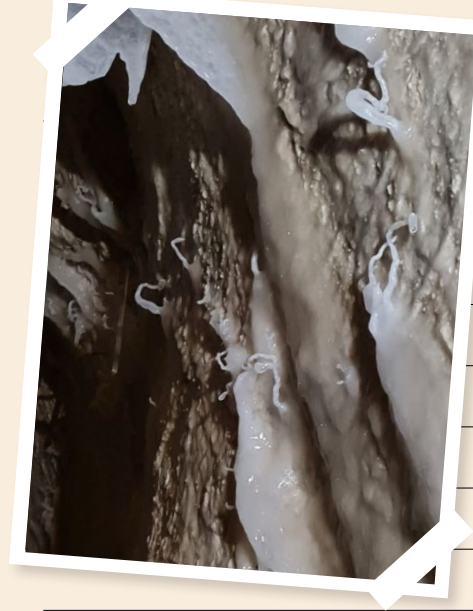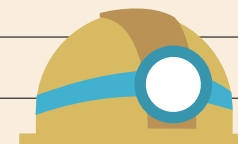

## CRUCIGROTTA

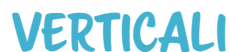

- 

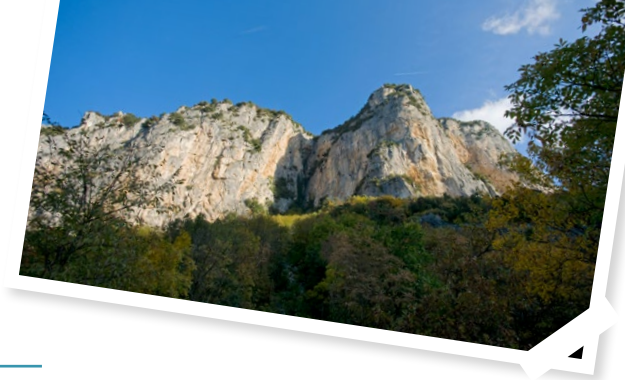

## ORIZZONTALI

6. Lo è il balconcino da cui si calarono gli scopritori
8. La sala con più... luce
9. Concrezioni bizzarre, stravaganti e...vanitose!
12. Come ragni scesero per primi nel buio nel lontano 1971
14. Come un albero, cresce dal basso verso l'alto
15. Quella del fiume Sentino ospita le grotte di Frasassi

# GROTTAGRAMMA

|   |   |   |   |   |    |   |   |   |   |   |   |   |   |   |   |   |    |   |   |   |   |   |   |   |   |
|---|---|---|---|---|----|---|---|---|---|---|---|---|---|---|---|---|----|---|---|---|---|---|---|---|---|
| A | B | C | D | E | F  | G | H | I | J | K | L | M | N | O | P | Q | R  | S | T | U | V | W | X | Y | Z |
|   |   |   | 7 |   | 24 |   |   |   |   |   | 8 |   |   |   |   |   | 17 |   |   |   |   |   |   |   |   |

|    |    |    |   |   |   |    |   |    |    |    |    |    |    |    |   |
|----|----|----|---|---|---|----|---|----|----|----|----|----|----|----|---|
| G  |    |    |   |   | E |    |   |    |    | S  |    | S  |    | S  |   |
| 24 | 21 | 16 | 3 | 3 | 7 | 26 | 9 | 19 | 21 | 18 | 17 | 18 | 17 | 17 | 9 |

|   |   |    |    |    |   |    |    |   |    |  |    |   |    |    |    |    |   |   |    |  |  |
|---|---|----|----|----|---|----|----|---|----|--|----|---|----|----|----|----|---|---|----|--|--|
| M | E |    |    |    |   | G  |    |   |    |  | G  | E |    |    |    |    | G |   |    |  |  |
| 8 | 7 | 21 | 18 | 22 | 9 | 24 | 25 | 9 | 18 |  | 24 | 7 | 16 | 25 | 16 | 24 | 9 | 6 | 18 |  |  |

|   |    |   |    |   |    |    |   |
|---|----|---|----|---|----|----|---|
| M |    |   |    |   |    |    | E |
| 8 | 16 | 5 | 26 | 9 | 18 | 25 | 7 |



Grotte di Frasassi, Genga - An

**[www.frasassi.com](http://www.frasassi.com)**

**" GROTTE DI  
|. FRASASSI**
