# Supplementary material
Source: MDPI journal article supplement (https://www.mdpi.com/2076-3263/12/11/418)
Supplement: s1 [file s1]

# Guida al **QUADERNO DIDATTICO**

I<sup>II</sup> GROTTI DI  
**I.** FRASASSI**i**

Se almeno una volta ti sei domandato il significato di un insolito paesaggio, di una vetta dalla forma curiosa, di una meravigliosa cavità sotterranea, hai provato sulla tua pelle cosa vuol dire essere geologo. Studiare geologia è stupirsi, incuriosirsi della natura, porsi delle domande per capire appieno ciò che ci circonda. Allora lo strato roccioso diventa la pagina di un libro da leggere con attenzione, che racconta come si è formata quella roccia sott'acqua e come poi è giunta in superficie. Il geologo sa leggere la natura, sa ricostruire la storia di meraviglie naturali come la gola e le grotte di Frasassi. Ed è solo grazie alle sue conoscenze che è possibile preservare, tutelare e valorizzare l'incredibile spettacolo della natura.

Il quaderno didattico è stato realizzato in collaborazione con

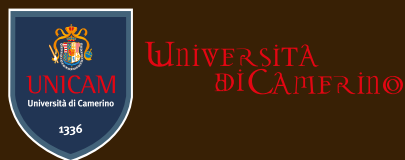

Autori: Fabrizio Bendia\* e Sandro Galdenzi\*  
Con la collaborazione di: Piero Farabollini\*, Stefano Mazzoli\*,  
Pietro Paolo Pierantoni\*, Emanuele Tondi\*

\*Sezione di Geologia dell'Università di Camerino (MC)

Impaginazione e grafica: Brugiatelli design®

## Introduzione e presentazione progettualità

Fra i più importanti obiettivi del Consorzio Frasassi risiede senz'altro quello di **approfondire gli aspetti scientifici del vastissimo comprensorio ipogeo**, consapevole che la valorizzazione, la salvaguardia e la promozione del patrimonio geologico possano essere perseguite soltanto tramite una profonda conoscenza dei fenomeni e delle leggi che regolano il pianeta Terra.

Grazie alla condivisione delle conoscenze con l'ambiente accademico della Sezione di Geologia dell'Università di Camerino (MC) è stato possibile approfondire gli studi e potenziare gli aspetti divulgativi e didattici, al fine di coinvolgere attivamente le migliaia di scolaresche che scelgono ogni anno di visitare questo territorio.

La condivisione di tali progettualità rappresenta un'importante occasione di crescita reciproca che ha portato alla realizzazione del presente documento. Esso per molti versi può essere considerato un vero e proprio viaggio, un itinerario multidisciplinare che tramite le conoscenze derivanti dallo studio delle scienze geologiche si prefigge l'arduo compito di comprendere e far comprendere i fenomeni naturali che hanno inciso sul territorio e che ci hanno consegnato le meraviglie ammirabili nei meandri della gola di Frasassi e al suo interno.

L'implementazione dell'offerta didattica rappresenta quindi un dovere morale del Consorzio Frasassi che, consapevole del potenziale ambientale del proprio territorio, mira a restituire alle scolaresche e a tutti i visitatori un'esperienza diretta, in cui gli studenti possano osservare e "toccare con mano" i fenomeni ammirabili e riscontrabili sul campo.

## UN'ESPERIENZA GEOLOGICA E SPELEOLOGICA

I quaderni didattici qui proposti sono stati impostati focalizzando l'esperienza sulla **disciplina in grado di accomunare le molteplici peculiarità presenti nel comprensorio di Frasassi: la geologia, ovvero quella scienza che studia i fenomeni che avvengono sul pianeta Terra.**

Tale scelta risulta in grado di conferire la dovuta continuità didattica ai laboratori scientifici allestiti presso i musei di San Vittore e di Genga, garantendo la possibilità di condurre interessanti approfondimenti direttamente sul campo e offrendo ai più curiosi un ampio ventaglio di occasioni di approfondimento.

Durante l'itinerario in grotta incontreremo moltissime formazioni rocciose e moltissime morfologie originarie e scolpite dall'**acqua**. Essa, infatti, vanta un ruolo essenziale nei processi che hanno condotto alla formazione dei sedimenti. Proprio così, perché la successione stratigrafica dell'area (cioè le rocce che vedete stratificate) è costituita da sedimenti depositi al di sotto del livello marino a partire dal periodo Giurassico (200 milioni di anni fa). Transitare lungo la gola di Frasassi e avventurarsi nelle sue grotte equivale pertanto a visitare un vero e proprio **Parco Giurassico**, in cui è possibile studiare le rocce alla ricerca delle testimonianze degli ambienti in cui esse si formarono e dei fenomeni che le hanno coinvolte nel tempo. **Passeggiando lungo la gola (ma anche all'interno della grotta!) è possibile osservare i fossili di organismi marini, inglobati all'interno della roccia calcarea che hanno contribuito a creare.**

Con il passare del tempo, a partire dal Miocene (20 milioni di anni fa) tutta l'area venne coinvolta in una fase di compressione tettonica

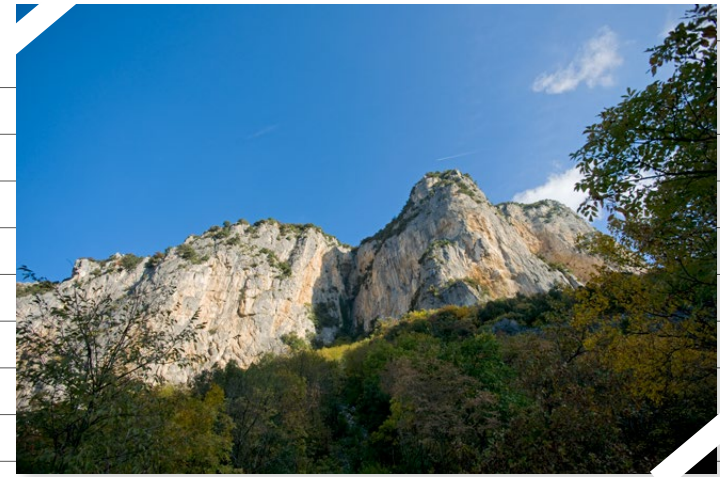

(collegata alla deriva dei continenti) che ha portato questi sedimenti sottomarini a piegarsi, a corrugarsi, a fratturarsi lungo faglie fino ad emergere dal fondale marino nel Quaternario (circa 2,5 milioni di anni fa).

I fenomeni geologici che hanno coinvolto l'area sono sicuramente imponenti e affascinanti: essi hanno creato prima una depressione marina che ha accolto sedimenti per spessori di migliaia di metri, poi hanno compresso queste rocce spingendole verso l'alto fino a creare la catena appenninica.

Ma una storia altrettanto sensazionale è avvenuta in seguito all'emersione dell'area (in ambiente subaereo). Da questo momento in poi l'acqua ha rappresentato un elemento essenziale per la modellazione del paesaggio, contribuendo nel contempo anche alla formazione delle grotte e alla loro successiva decorazione tramite le concrezioni!

## DIDATTICA ESPERIENZIALE E SVILUPPO SOSTENIBILE

Questo strumento didattico si prefigge di rappresentare un'occasione pratica di approfondimento delle tematiche trattate in aula e durante l'esperienza a Frasassi.

Alla luce dell'impronta altamente interattiva che gli è stata attribuita, **il quaderno didattico può essere considerato un vero e proprio laboratorio a cielo aperto (anzi, in questo caso, un laboratorio sotterraneo)**, impostato seguendo un percorso grazie al quale sia possibile ammirare da vicino e comprendere le forme originate e modellate grazie agli eterni e instancabili processi geologici.

Per diventare un vero speleologo bisogna anzitutto saper leggere il paesaggio che ci circonda, quindi sapersi orientare anche in ambienti molto diversi rispetto a quello a cui siamo abituati.

Il coinvolgimento attivo degli studenti nel presente percorso didattico rappresenta un elemento di forza della progettualità proposta, (empiricamente) convinti che consolidamento delle conoscenze e comprensione dei fenomeni siano facilitati dalla diretta osservazione e dalle esperienze maturate sul campo.

## OBIETTIVI

Durante l'esperienza didattica in grotta gli studenti verranno stimolati a orientarsi all'interno di essa lungo le tre dimensioni, utilizzando quindi sia una rappresentazione in pianta che una in sezione.

In seguito all'analisi degli elementi osservati, gli studenti verranno coinvolti nella stesura di una elementare carta geologica multidisciplinare, in cui potranno riportare i più importanti elementi incontrati: **sedimentari** (depositi di gesso), **geomorfologici** (frana), **idrogeologici** (livelli idrici), **stratigrafici** (stratificazione della roccia), **speleologici** (concrezioni) e **strutturali** (faglia).

Verranno infatti disegnati su mappa la distribuzione dei depositi di gesso e dei corpi di frana, le principali concrezioni, la stratificazione della roccia e sarà tracciata in pianta la vecchia faglia (collegando i 3 punti in cui le porzioni di essa sono visibili).

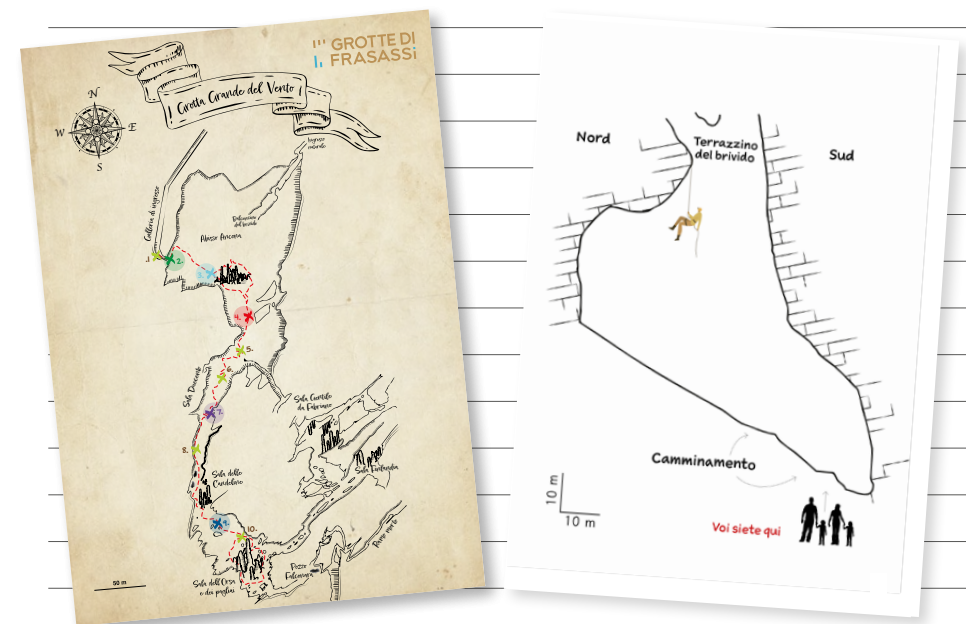

## LA GEOLOGIA E IL CARISMO DI FRASASSI

### Cosa è una grotta?

La grotta è una cavità naturale accessibile all'uomo. Le grotte possono formarsi per diverse cause, ma le più comuni sono le **grotte carsiche**, formate cioè dall'azione di dissoluzione esercitata dalle acque sulle rocce. Le rocce più tipicamente interessate sono i calcari, rocce molto comuni nel nostro Appennino. **Sono rocce calcaree quelle che il Fiume Sentino incide lungo la Gola di Frasassi ed all'interno di esse si sviluppano anche le Grotte di Frasassi.**

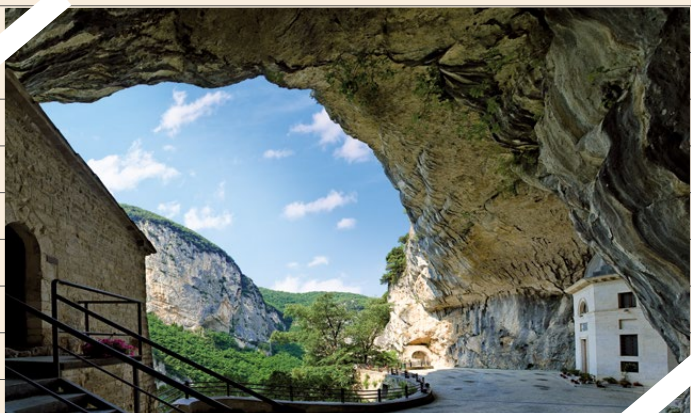

### Come riesce l'acqua a sciogliere la roccia calcarea?

Le gocce di pioggia durante la loro discesa in atmosfera e durante il loro percorso nel sottosuolo si arricchiscono di anidride carbonica diventando altamente corrosive. Esse percolano nel terreno "sciogliendo" la roccia calcarea e creando delle piccole cavità (come delle piccole carie) che, nel tempo, si uniscono fra loro dando origine ad ambienti più grandi.

A Frasassi, inoltre, il processo di corrosione della roccia è stato velocizzato dalla presenza di un particolare tipo di acque provenienti, questa volta, direttamente dal basso, le **acque sulfuree**. È soprattutto grazie a loro che si sono formate cavità così grandi. Si può percepire la presenza di queste acque perché sono loro le responsabili dell'odore di uovo sodo che si sente attraversando la gola.

### Quanto sono estese le grotte di Frasassi?

A Frasassi sono conosciute e descritte oltre **100 grotte**, che fanno parte di uno stesso sistema carsico, solo parzialmente conosciuto e accessibile all'uomo, la cui lunghezza complessiva è stimata in oltre **35 km**. **L'Abisso Ancona rappresenta la cavità più ampia del comprensorio carsico di Frasassi e con il suo milione di metri cubi rappresenta l'ambiente sotterraneo più grande d'Europa.**

### C'è acqua nelle grotte?

L'acqua presente nelle grotte appartiene a due tipi principali: le **acque piovane** (che si infiltrano dall'alto e che spesso ci arrivano come goccioline sulla testa) e quelle **sulfuree** (provenienti dal basso). Scendendo verso il basso, le acque finiscono col colmare tutti gli spazi vuoti all'interno della roccia. Si forma così la cosiddetta falda idrica, che è possibile osservare nell'ultima sala del nostro itinerario.

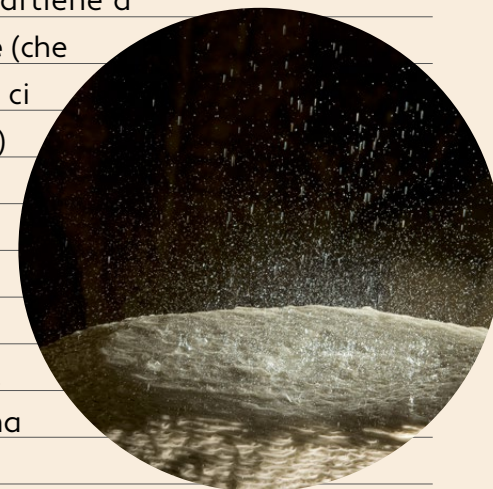



## Che struttura hanno?

Le Grotte di Frasassi costituiscono un insieme assai ramificato di gallerie, pozzi e cunicoli sotterranei ad andamento principalmente orizzontale. Esse sono chiaramente distribuite su **sette livelli chiamati piani carsici**, che si sono formati durante l'incisione della gola nei lunghi periodi in cui il torrente Sentino stazionava a quella altezza.

## Quando si sono formate?

Le concrezioni più antiche hanno circa **200.000 anni**, ma ovviamente la grotta è più antica dei depositi che contiene e si può ritenere che **la formazione delle prime gallerie sia iniziata circa 2 milioni di anni fa**.

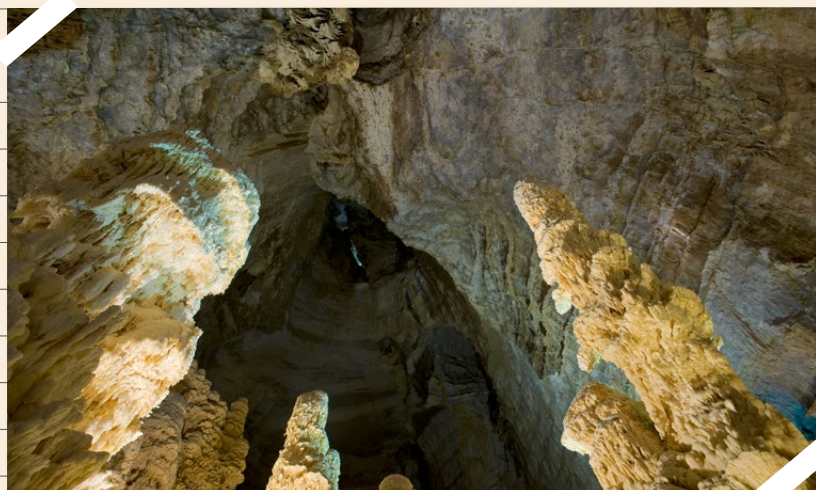

## Perché c'è il gesso?

Il gesso, presente in molti tratti del camminamento turistico, rappresenta diretta testimonianza della passata circolazione di **acque sulfuree**. Negli ambienti in cui sono presenti esse rilasciano delle esalazioni in grado di attaccare la roccia calcarea e trasformarla in gesso. Questo minerale è più facilmente solubile e quindi in larga parte viene disciolto e asportato dalle acque circolanti.

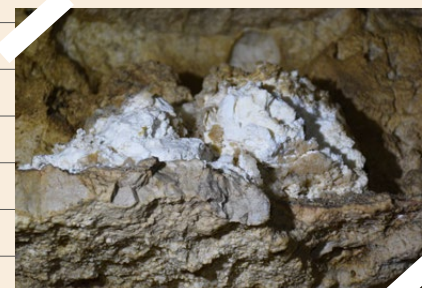

## Perché si formano le concrezioni?

Una galleria abbandonata dalle acque della falda diviene un vuoto nella roccia. Quando l'acqua di infiltrazione che scende dall'alto ne raggiunge la volta può perdere l'anidride carbonica che aveva assorbito, depositando una piccola patina del carbonato che aveva disciolto. Si tratta, in sostanza, dell'inverso di quanto avvenuto nel primo tratto del percorso sotterraneo della goccia: **una parte del calcare che era stato disciolto viene ora depositato, in genere sotto forma di calcite**.

Con il tempo il lento e costante accumulo di questi veli di calcite origina le concrezioni, con una grande varietà di forme e colori, che danno a ogni concrezione il suo caratteristico aspetto e decorano la grotta.

## Quanto crescono le concrezioni?

Una delle domande più frequenti che il visitatore di una grotta si pone riguarda il tempo necessario per la crescita delle concrezioni in una grotta, in particolare per stalattiti, sulla volta, e stalagmiti, sul pavimento.

**La velocità in realtà può essere piuttosto variabile, soprattutto in relazione al tipo di concrezione.** Il primato spetta sicuramente alle piccole stalattiti tubolari (chiamate capelli d'angelo o spaghetti) per le quali sono riportati valori fino a 20 mm/anno (2 cm).

Per le grandi stalattiti il ritmo di crescita è molto minore, pari a meno di 0,1 fino a 2 mm/anno. Per le stalagmiti la crescita in altezza è ancora più lenta: da 0,005 a 0,7 mm/anno. Ritmi lenti, ma grandi stalagmiti come i Giganti hanno potuto accrescersi in poco più di 100.000 anni, pochi istanti, nei tempi geologici!

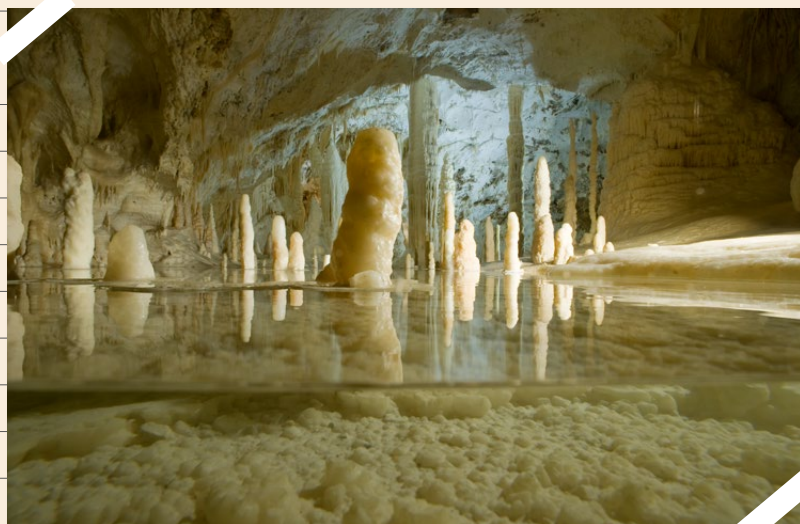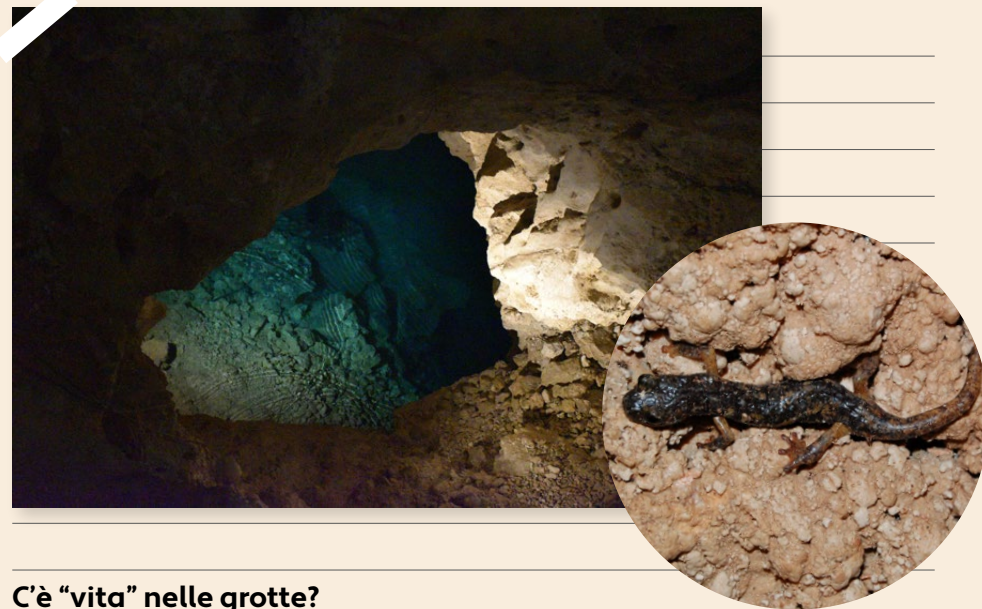

## C'è "vita" nelle grotte?

In generale le zone interne delle grotte rappresentano ambienti sfavorevoli per la fauna. L'assenza di luce impedisce lo sviluppo di piante e organismi, che rappresentano la base della catena alimentare in superficie.

Tuttavia le zone sulfuree delle grotte di Frasassi sono insolitamente ricche di fauna, ben adattata alla vita sotterranea. Le ricerche condotte alla fine del secolo scorso hanno dimostrato che questa comunità di piccoli animali sotterranei sopravvive nutrendosi a spese delle colonie di batteri.

**In grotta possiamo trovare un anfibio che vive stabilmente nelle grotte, il geotritone.** Esso è lungo 8-10 cm, ha gli occhi atrofizzati e con la sua lunga lingua si nutre di insetti e ragni. **Negli ambienti più vicini all'aria aperta vive una delle più grandi colonie di pipistrelli dell'Italia centrale.**



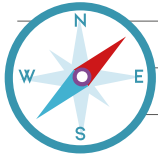

## CHE ABBAIA INIZIO L'AVVENTURA!

I quaderni didattici sono strutturati in modo tale da prevedere delle schede di approfondimento per la guida turistica e per il docente. A ognuna di esse è associata la relativa scheda didattica interattiva tramite la quale lo studente dovrà applicare quanto osservato e imparato in grotta.

Come in ogni mappa che si rispetti, il percorso che seguiremo è tracciato in rosso mentre i punti di interesse (le varie soste) sono segnalate sulla mappa con una croce. Queste sono numerate progressivamente e saranno di colore verde chiaro qualora non dovessero prevedere interazioni con le schede, mentre saranno di colore **verde, celeste, rosso, viola e blu** nelle soste in cui sono previsti approfondimenti tramite le schede didattiche

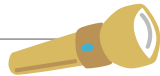

Per facilitare le osservazioni in caverne, nicchie e anfratti potrebbe risultare utile portare in grotta con sé una torcia, un righello e una bussola: strumenti indispensabile per tutti gli esploratori.

**La mappa la forniamo noi ma dovrà essere completata e arricchita di importanti elementi!**

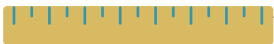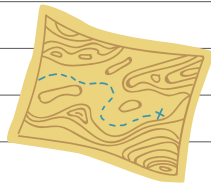

Questi oggetti ci aiuteranno anche nella ricerca del vero tesoro, nascosto nella sala più misteriosa e nascosta delle grotte: **la Sala dell'infinito**.

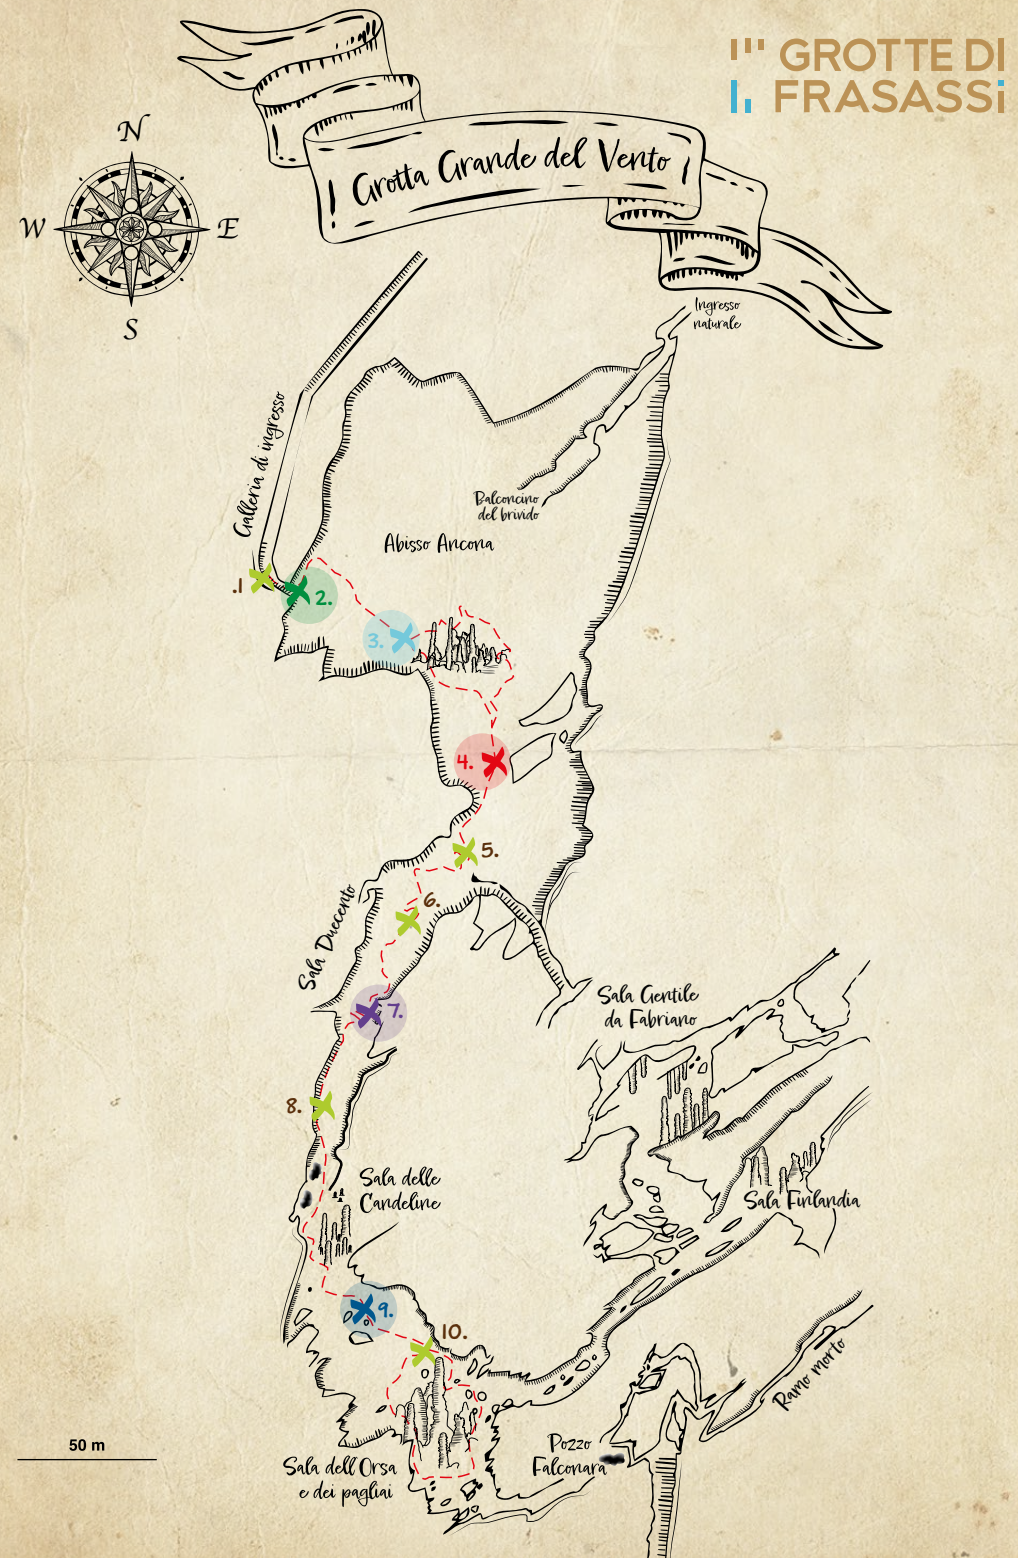



## 2. SOSTA ABISSO ANCONA

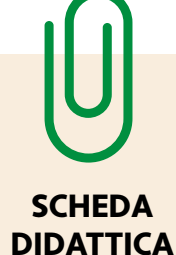

Durante questa sosta verrà approfondita l'attività di **orienteering in grotta**, utile agli studenti per stimolare un pensiero parallelo che spinga a osservare le diverse situazioni da un punto di vista differente. Orientarsi in ambiente ipogeo è sicuramente molto diverso dal farlo negli ambienti esterni, in quanto troviamo punti di riferimento del tutto insoliti. Ma ne esistono comunque moltissimi e in grado di rappresentare un punto saldo per moltissimo tempo. Aniché montagne, fiumi, palazzi, alberi, lampioni e strade, gli esploratori in grotta utilizzano le morfologie delle pareti, le particolari forme delle concrezioni, i laghetti e i vari depositi che rinveniamo sul terreno (depositi di gesso, accumuli di frana).

Durante la sosta "Abisso Ancona" sarà illustrata la mappa di questo complesso carsico noto come Grotta Grande del Vento, suggerendo agli studenti alcuni essenziali aiuti già inseriti in mappa per facilitare l'orientamento: l'orientazione del nord in grotta, la posizione della Sala Abisso Ancona e i principali punti di riferimento che utilizzeremo per orientarci - l'imbocco del tunnel d'ingresso alle nostre spalle, la piazzola in cui ci si trova al momento (contrassegnata da una croce verde), il camminamento turistico (tracciato in mappa in rosso), le pareti della grotta, i giganti e il balconcino del brivido.

In questa sosta dovranno essere illustrati dalla guida i depositi di gesso visibili nella parete ovest (per intenderci tra l'imbocco della

galleria e la "fetta di pancetta"), che i ragazzi dovranno imparare a riconoscere e riportare sulla cartografia.

Un altro importante elemento da cartografare nell'Abisso Ancona è rappresentato dal corpo di frana, prevalentemente deposto sulla sinistra del camminamento. Gli studenti più estrosi disegneranno un accumulo di blocchi di roccia visto in pianta, ma è corretto anche disegnare un poligono quindi sfumarne la colorazione o riempirlo con un retino.

Qui termina questa prima attività ma avvisate i nuovi aspiranti speleologi di tenere gli occhi bene aperti perché il loro compito sarà quello di **riconoscere il gesso nella sala Abisso Ancona e disegnarlo in pianta sulla mappa** (considerando sempre il fattore di scala, quindi occhio alla barra in basso!). Questa cartografia, infatti, accompagnerà i ragazzi per tutta la visita. Va prestata particolare attenzione a non confondere la colorazione biancastra del gesso, con il bianco candido della calcite o di altre concrezioni. Un piccolo aiuto? Si nasconde abbondante attorno ai giganti... ma esso è disposto a macchia di leopardo un po' per tutta la grotta.

**Curiosità geologica: perché il gesso ha avuto un ruolo fondamentale nella speleogenesi delle grotte di Frasassi?** Il gesso si forma per l'interazione tra l'acqua sulfurea e la roccia calcarea, ma esso non riveste solo un interesse mineralogico. La formazione della grotta può infatti essere intuitivamente spiegata immaginando che il calcare venga disciolto dopo essere trasformato in gesso, più solubile e quindi facilmente asportato dalle acque. Il gesso in effetti può conservarsi solo sopra il livello delle acque sulfuree.

### 3. SOSTA AL LAGHETTO CRISTALLIZZATO

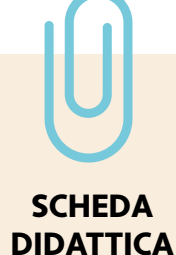

Un ulteriore metodo di rappresentazione cartografica è rappresentato dalla raffigurazione di un ambiente in sezione. In questa scheda didattica sarà possibile osservare uno spaccato nord-sud dell'Abisso Ancona e gli studenti dovranno cambiare prospettiva passando, appunto, **dalla visualizzazione in pianta a quella in sezione.**

Per meglio comprendere il concetto di sezione, invitate i ragazzi ad immaginare di fare un **taglio verticale alla grotta, proprio come se dovessero tagliare una fetta di torta.**

L'osservazione in sezione permette di comprendere come varia la stratificazione nel sottosuolo, come sono disposti gli acquiferi e quali depositi sono più antichi o più recenti rispetto ad altri.

In questo esercizio dovranno essere riportati gli elementi in sezione a partire dall'evento più antico, fino al più recente. Pertanto dovranno essere tracciati innanzitutto gli strati rocciosi sullo sfondo della caverna. Questi, ovviamente, furono il primo elemento a formarsi lungo la scala temporale (nel Giurassico, 200 milioni di anni fa). In questo caso la stratificazione è più o meno orizzontale, regolare e ben riconoscibile ma molto spesso, soprattutto in altre rocce, essa si presenta come inclinata, verticale, oblitterata, fratturata, piegata o fagliata.

In seguito alla deposizione della roccia, essa è emersa e quindi è iniziato il processo carsico che ha creato ampi crolli (frane) responsabili

dei vuoti al suo interno. **Pertanto il secondo elemento da riportare in pianta sarà il corpo di frana.**

Successivamente alla fase di "distruzione" della grotta, si sono impostati i processi di "costruzione", grazie alla deposizione della calcite che ha letteralmente adornato le sue superfici. L'acqua piovana si infiltrava all'interno della roccia arricchendosi di  $\text{CaCO}_3$  che, una volta giunta in prossimità di una cavità, veniva rilasciato come patina a causa della variazione delle condizioni di pressione a cui essa era costretta all'interno dell'ammasso roccioso. Si formarono così le concrezioni!

Quindi la prossima attività sarà decorare la nostra grotta raffigurando i giganti (sono alti massimo 20 metri, quindi occhio alla scala!) I più attenti potranno disegnare anche le stalagmiti al di sopra dei blocchi franati, testimonianza del fatto che la frana è più antica delle concrezioni.

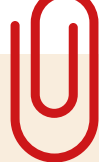

### SCHEDA DIDATTICA

#### 4. SOSTA ALLA CASCATA DEL NIAGARA

Questa sosta prevede la possibilità di effettuare due diverse attività didattiche.

1. Come tutte le materie scientifiche, **anche le scienze geologiche hanno bisogno di solide basi matematiche su cui fondare le proprie leggi**. In questa seconda attività didattica sarà proposto agli alunni di partire dalla mappa della Sala Abisso Ancona e calcolarne perimetro ed area. Questo obiettivo sarà facilmente raggiungibile assimilando la pianta della sala ad un quadrato. Ovviamente va considerata attentamente la barra di scala per valutare la giusta lunghezza delle pareti della grotta.

2. Ormai è un po' di tempo che avanziamo in grotta e già abbiamo avuto modo di osservare quali sono gli elementi decorativi principali (in termine tecnico si chiamano concrezioni, o speleotemi) che hanno contribuito ad abbellire queste pareti. La seconda attività didattica in questa sosta prevede di applicare quanto osservato finora, **associando la giusta terminologia agli elementi che possiamo osservare in questo scorcio di grotta** ai piedi dei giganti semplicemente tracciando con il pennarello una linea di collegamento.

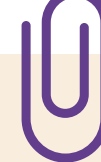

### SCHEDA DIDATTICA

#### 7. SOSTA SOTTO L'OBELISCO

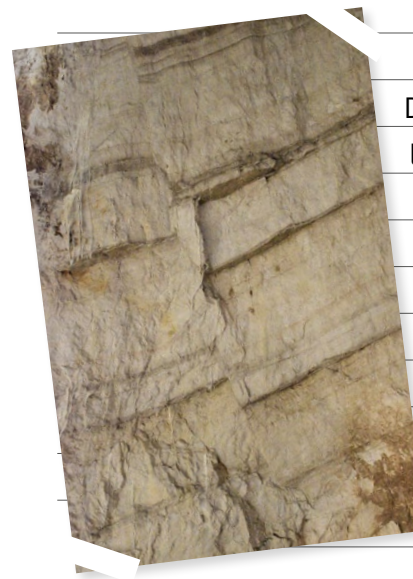

Da questa prospettiva è possibile osservare la faglia che ha dislocato la parete rocciosa della Sala duecento ed il suo proseguimento, lungo la porzione piana di parete in cui sono presenti i “capelli d’angelo”. Posizioniamo su carta i 2 punti (ognuno nel luogo in cui abbiamo riconosciuto una porzione del lineamento) quindi colleghiamoli attraverso una linea. Per 2 punti allineati passa una retta. **Abbiamo appena imparato a cartografare una faglia!**

#### Curiosità geologica: perché cartografare le faglie?

Assume rilevante importanza notare (e far notare) come il lineamento in pianta abbia la stessa direzione del ramo carsico che il gruppo sta percorrendo (la Sala duecento), a testimonianza del fatto di come le faglie, così come le fratture della roccia ed i giunti di stratificazione, abbiano fortemente condizionato l'impostarsi del reticolo ipogeo.



## 9. SOSTA ALLA SALA DELL'ORSA E DEI PAGLIAI

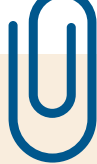

## SCHEDA DIDATTICA

In alcuni anfratti della Sala dell'orsa e dei pagliai (anche nota come Sala dell'infinito) è possibile ammirare una particolare tipologia di stalattiti, chiamate **eccentriche**. Questi sono speleotemi molto particolari, in quanto l'accrescimento della stalattite non avviene dall'alto verso il basso ma segue vie preferenziali sviluppandosi localmente in orizzontale o, addirittura, dal basso verso l'alto.

**Una vera e propria sfida alle leggi di gravità!**

Questo tipo di concrezione può assumere le forme più fantasiose, spesso esse si presentano simili a dei rami o a dei riccioli.

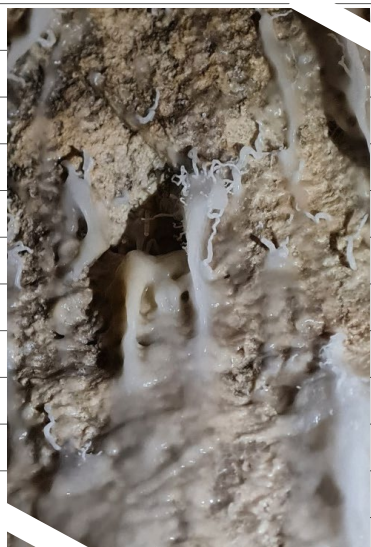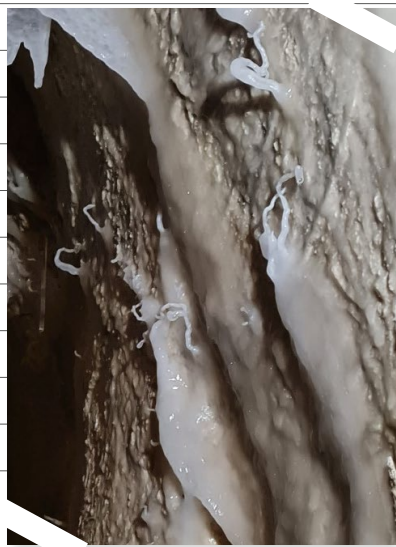

# E DOPO TANTE ESPLORAZIONI FINALMENTE UN PO' DI RELAX

Il tour in grotta è stato sicuramente appassionante e scenografico ma ha richiesto anche molta concentrazione nell'ascoltare la spiegazione della guida e nello svolgere gli esercizi delle schede didattiche.

Abbiamo pensato di prevedere anche un momento di relax, magari da svolgere durante la pausa spuntino o durante il viaggio di ritorno in pullman con un CRUCIGROTTA e un CRITTOGRAMMA.

# E DOPO TANTE ESPLORAZIONI, FINALMENTE UN PO' DI RELAX

## CRUCIGROTTA

## VERTICALI

1. L'acqua che odora di uovo sodo
2. Ne troviamo tracce residue disposte a macchia di leopardo
3. Quelle in grotta non sono... portanti
4. Il fenomeno geologico responsabile della creazione delle cavità ipogee
5. La sala che si chiama così grazie alla sua lunghezza
7. Nel Giurassico nuotava in queste acque, oggi lo troviamo un po'... dimagrito
10. È Massiccio quello di Frasassi
11. Scende lentamente dall'alto verso il basso
13. Tra due... sassi!

## ORIZZONTALI

6. Lo è il balconcino da cui si calarono gli scopritori
8. La sala con più... luce
9. Concrezioni bizzarre, stravaganti e...vanitose!
12. Come ragni scesero per primi nel buio nel lontano 1971
14. Come un albero, cresce dal basso verso l'alto
15. Quella del fiume Sentino ospita le grotte di Frasassi

## GROTTAGRAMMA

|   |   |   |   |   |   |    |   |   |   |   |   |   |   |   |   |   |   |    |   |   |   |   |   |   |   |
|---|---|---|---|---|---|----|---|---|---|---|---|---|---|---|---|---|---|----|---|---|---|---|---|---|---|
| A | B | C | D | E | F | G  | H | I | J | K | L | M | N | O | P | Q | R | S  | T | U | V | W | X | Y | Z |
|   |   |   | 7 |   |   | 24 |   |   |   |   |   | 8 |   |   |   |   |   | 17 |   |   |   |   |   |   |   |

$$\begin{array}{ccccccc} G & & & E & & & \\ \hline 24 & 21 & 16 & 3 & 3 & 7 & \\ & & & 26 & 9 & & \\ & & & & & S & S & S \\ & & & 19 & 21 & 18 & 17 & 18 & 17 & 17 & 9 & \end{array}$$

$$\begin{array}{ccccccc} M & E & & G & & & \\ \hline 8 & 7 & 21 & 18 & 22 & 9 & 24 & 25 & 9 & 18 & & G & E & & G & & \\ \hline & & & & & & 24 & 7 & 16 & 25 & 16 & 24 & 9 & 6 & 18 & \end{array}$$

$$\begin{array}{ccccccc} M & & & E & & & \\ \hline 8 & 16 & 5 & 26 & 9 & 18 & 25 & 7 & \end{array}$$

Grotte di Frasassi, Genga - An

**[www.frasassi.com](http://www.frasassi.com)**

**" GROTTE DI  
|. FRASASSI**
