# Supplementary material
Source: MDPI journal article supplement (https://www.mdpi.com/2076-3263/12/11/418)

# I<sup>II</sup> GROTTA DI FRASASSI

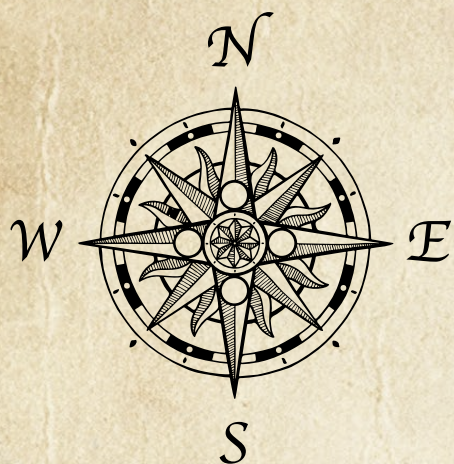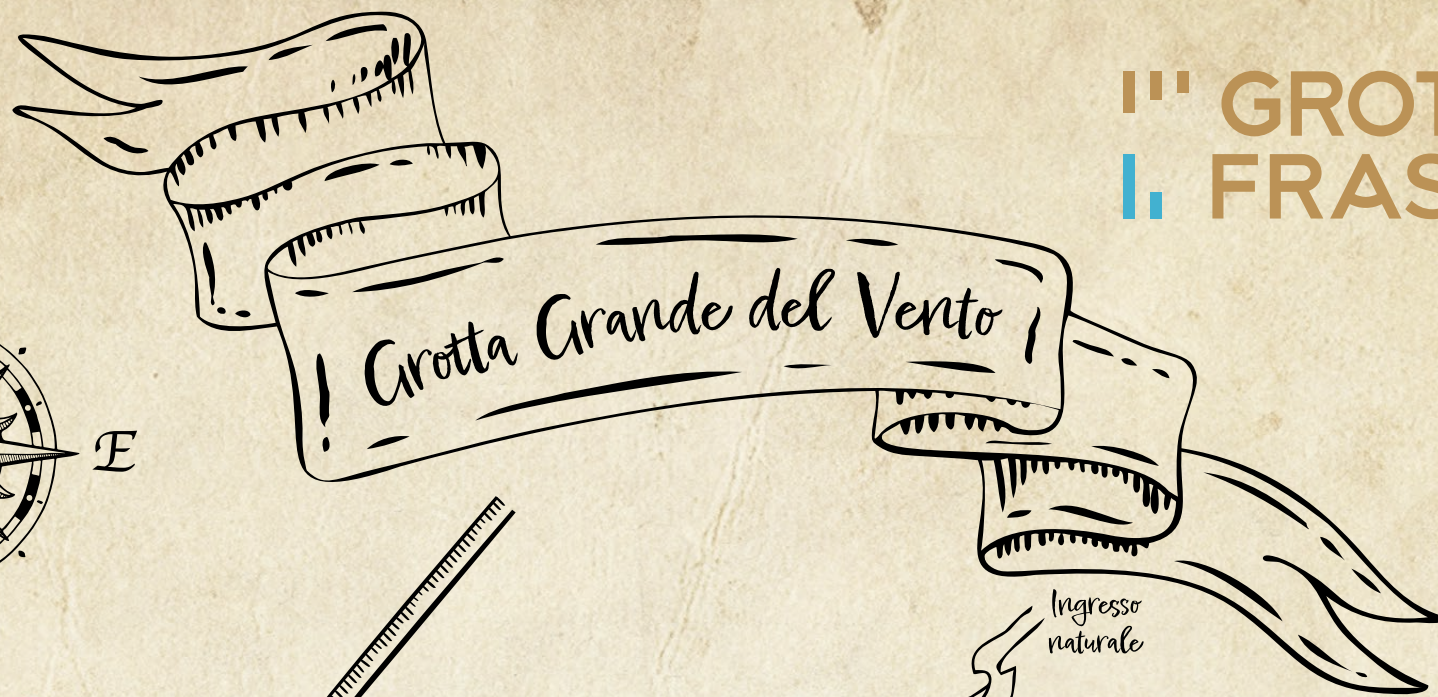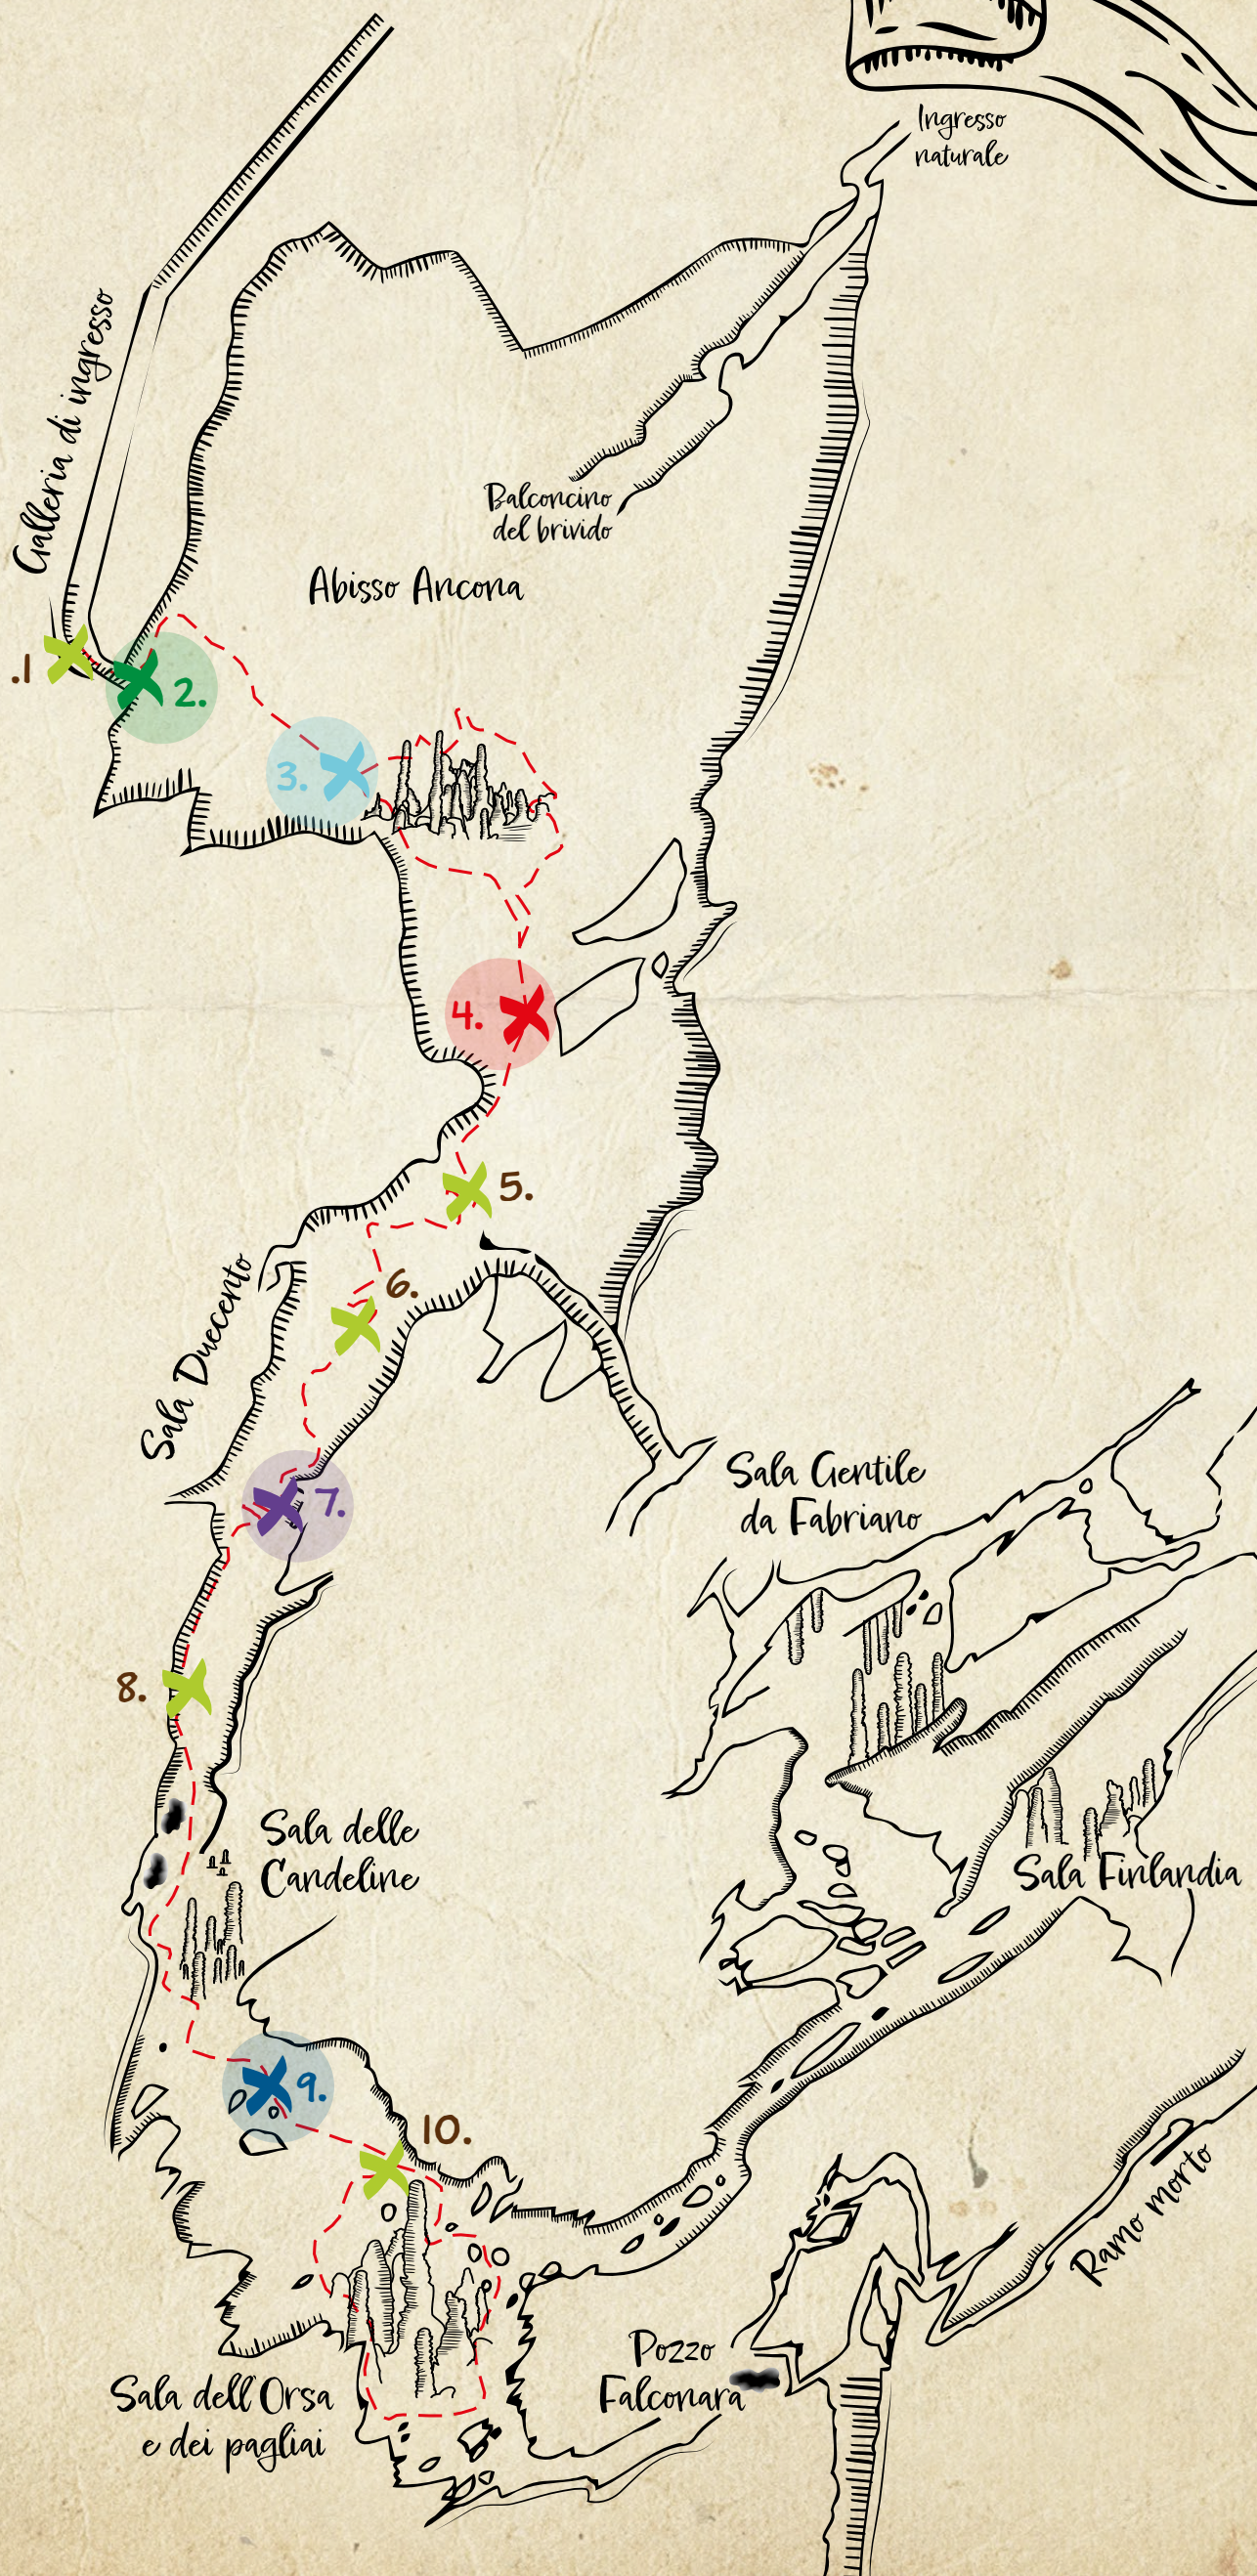

50 m

Supplement: s1 [file s1]
